# Supplementary material for: Explosive synchronization as a process of explosive percolation in dynamical phase space
Source: PubMed Central journal article supplement (PMC4650870; doi:10.1038/srep05200), 2014-06-06
Supplement: srep05200-s2.pdf [file srep05200-s2.pdf]

# Explosive synchronization as a process of explosive percolation in dynamical phase space

Xiyun Zhang<sup>1</sup>, Yong Zou<sup>1</sup>, S. Boccaletti<sup>2</sup> and Zonghua Liu<sup>1</sup>

## 1 Supplementary Figures

[ht]

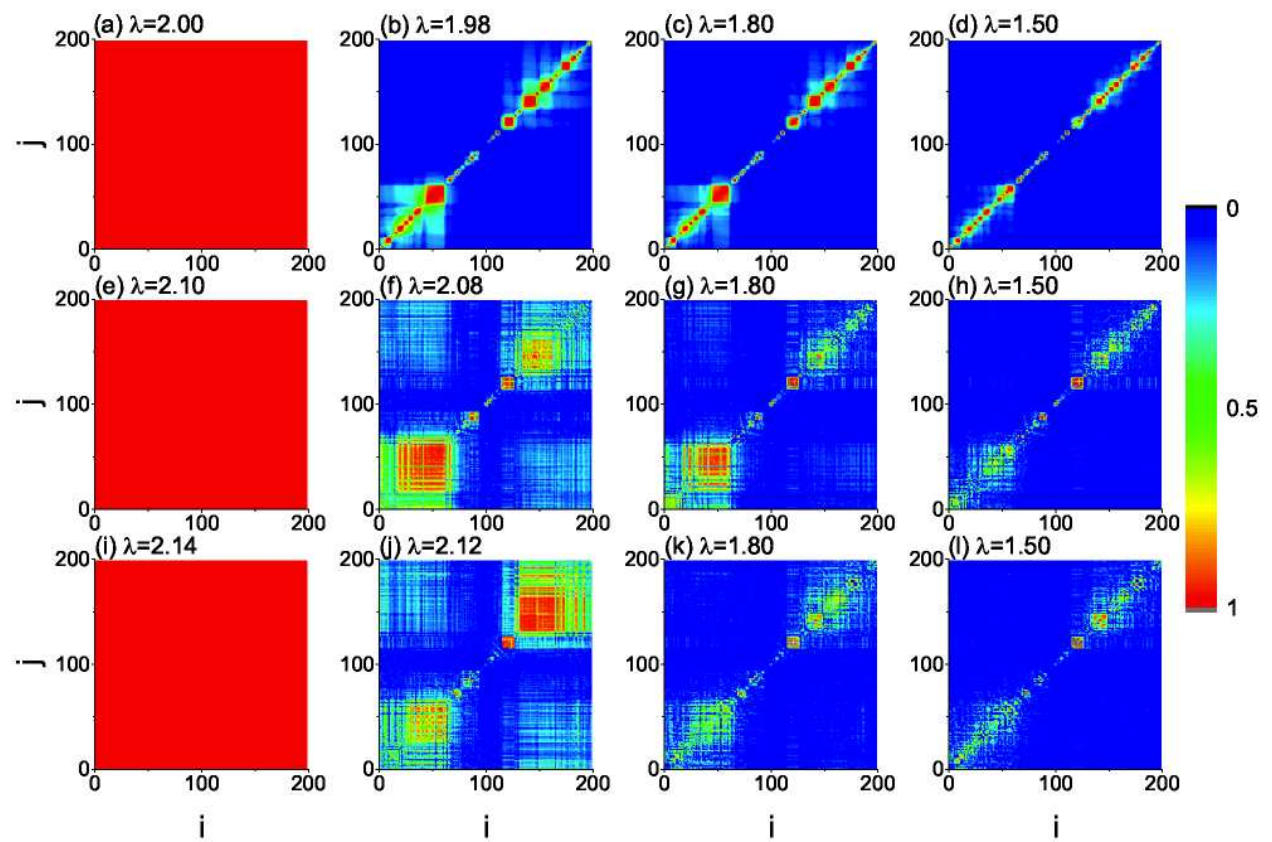

[ht]

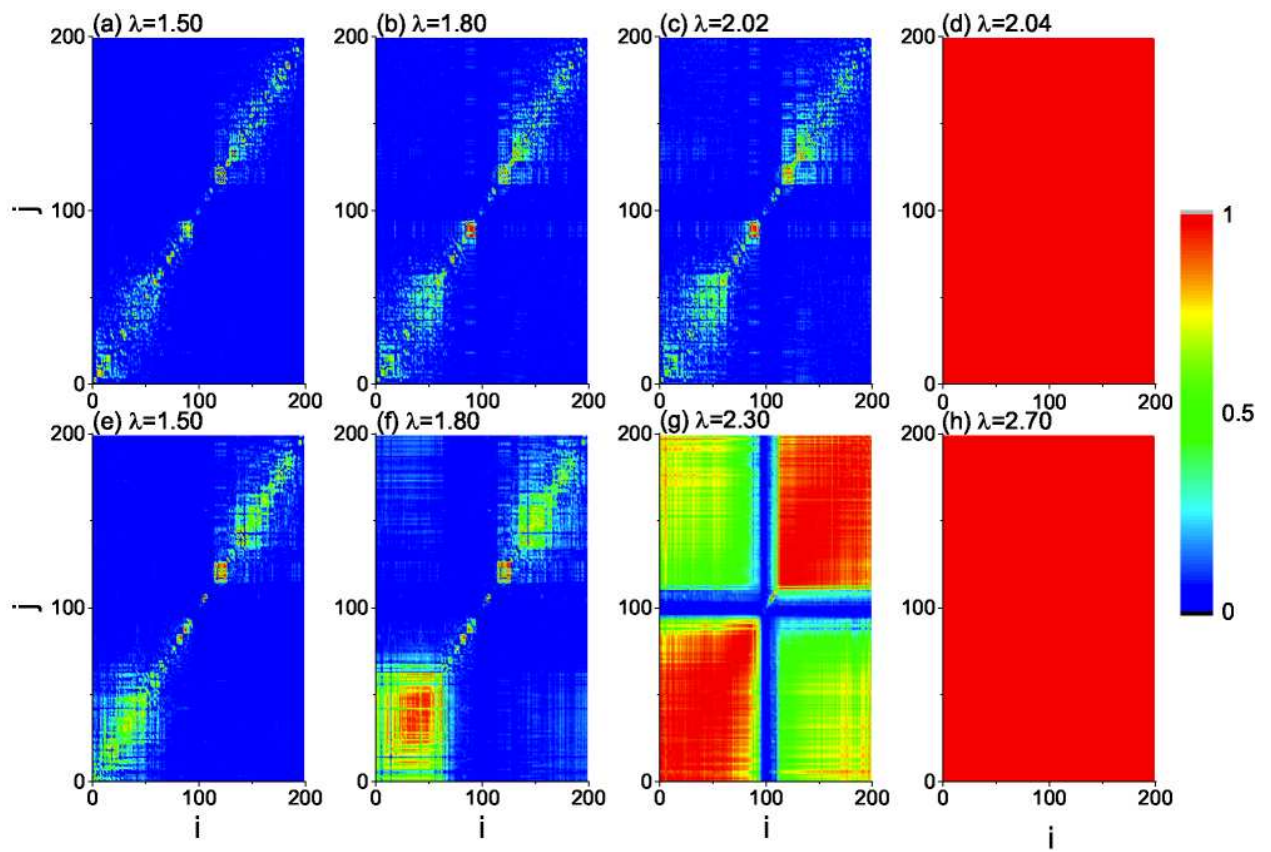

[ht]

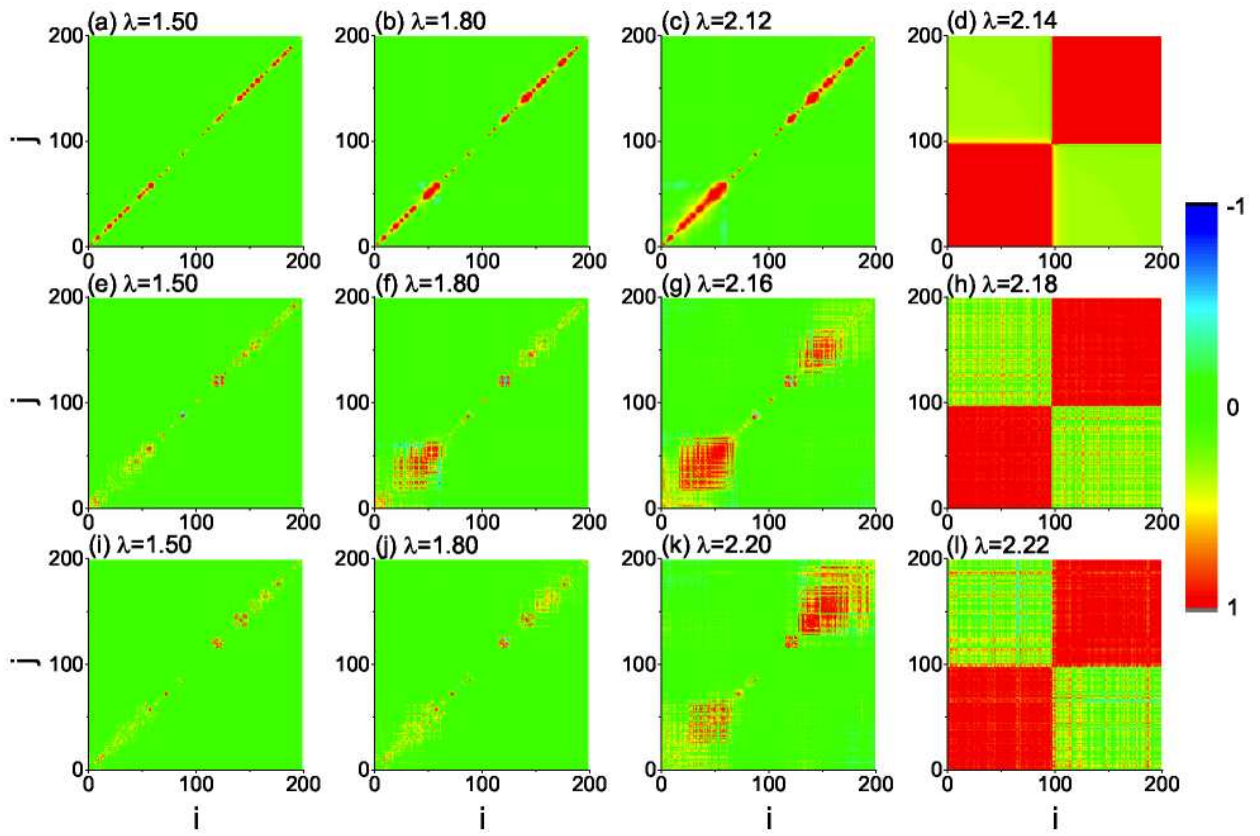

## 2 Supplementary Movie

**Figure 1** (Color online.) **Case of backward transition corresponding Fig. 2 in main text.**

Plots of the matrix  $R_{ij}$  for fully connected (first line), ER (second line) and UCM (third line) networks, where the oscillator  $i$  is labeled by the ascending order of frequency  $\omega_i$ . The coupling strengths are  $\lambda = 2.0, 1.98, 1.8,$  and  $1.5$  in (a)-(d) ( $\lambda_c = 1.99$ );  $\lambda = 2.1, 2.08, 1.8,$  and  $1.5$  in (e)-(h) ( $\lambda_c = 2.09$ ); and  $\lambda = 2.14, 2.12, 1.8,$  and  $1.5$  in (i)-(l) ( $\lambda_c = 2.13$ ).

**Figure 2** (Color online.) **Local order parameter  $R_{ij}$  for the case of varying  $P$  (see main text for definitions).**

Data to be compared with Fig.4(a) of the main text. First line: Plots of the matrix  $R_{ij}$  with  $P = 0.63$  and  $\lambda_c = 2.03$ , where the coupling strengths are set to be  $\lambda = 1.5$  (a),  $\lambda = 1.8$  (b),  $\lambda = 2.02$  (c), and  $\lambda = 2.04$  (d). Second line: Plots of the matrix  $R_{ij}$  with  $P = 0.41$ , where the coupling strengths are set to be  $\lambda = 1.5$  (e),  $\lambda = 1.8$  (f),  $\lambda = 2.3$  (g), and  $\lambda = 2.7$  (h). Notice that, in (e)-(h), the small original synchronized clusters gradually merge together to form a giant synchronized cluster, indicating a second-order transition.

**Figure 3** (Color online.) **Measuring cross correlation by  $F_{ij} = \langle \cos(\theta_i - \theta_j) \rangle$ .**

Plots of the matrix  $F_{ij}$ , for fully connected (first line), ER (second line) and UCM (third line) networks. The coupling strengths are  $\lambda = 1.5, 1.8, 2.12,$  and  $2.14$  in (a)-(d) ( $\lambda_c = 2.13$ );  $\lambda = 1.5, 1.8, 2.16,$  and  $2.18$  in (e)-(h) ( $\lambda_c = 2.17$ ); and  $\lambda = 1.5, 1.8, 2.20,$  and  $2.22$  in (i)-(l) ( $\lambda_c = 2.21$ ).
